# Supplementary material
Source: ML conference proceedings conference paper supplement (https://openreview.net/forum?id=dXOh7bX6KU)
Supplement: supplementary_material [file attachment]

# A LARGE-SCALE DATASET FOR ROBUST COMPLEX ANIME SCENE TEXT DETECTION (SUPPLEMENTARY MATERIAL)

**Anonymous authors**

Paper under double-blind review

## 1 DENSITY STRATIFIED ANALYSIS

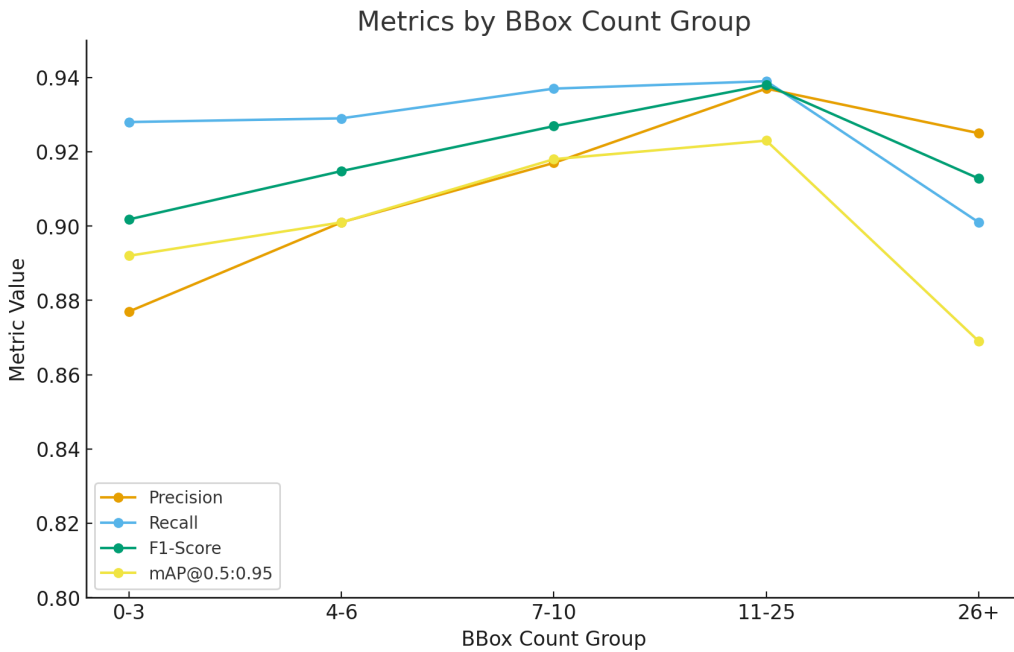

Figure I: Density-stratified dataset evaluation.

Figure I shows the density-stratified analysis, measuring anime text detector performance across images with varying text densities. The resulting curves show that while performance slightly decreases for extremely high-density images, the detection performance remains relatively stable across most density levels. This demonstrates the robustness of the dataset and baseline models against varying text distributions.

## 2 DATA DIVERSITY ANALYSIS

AnimeText dataset explicitly includes a wide variety of real-world and user-generated content (as shown in Figure II), including screenshots, edited anime images, comics, posters, derivative fan works, and AI-generated images. This diversity is a key advantage of AnimeText over existing manga or comic datasets, which often rely on clean, scanned pages.

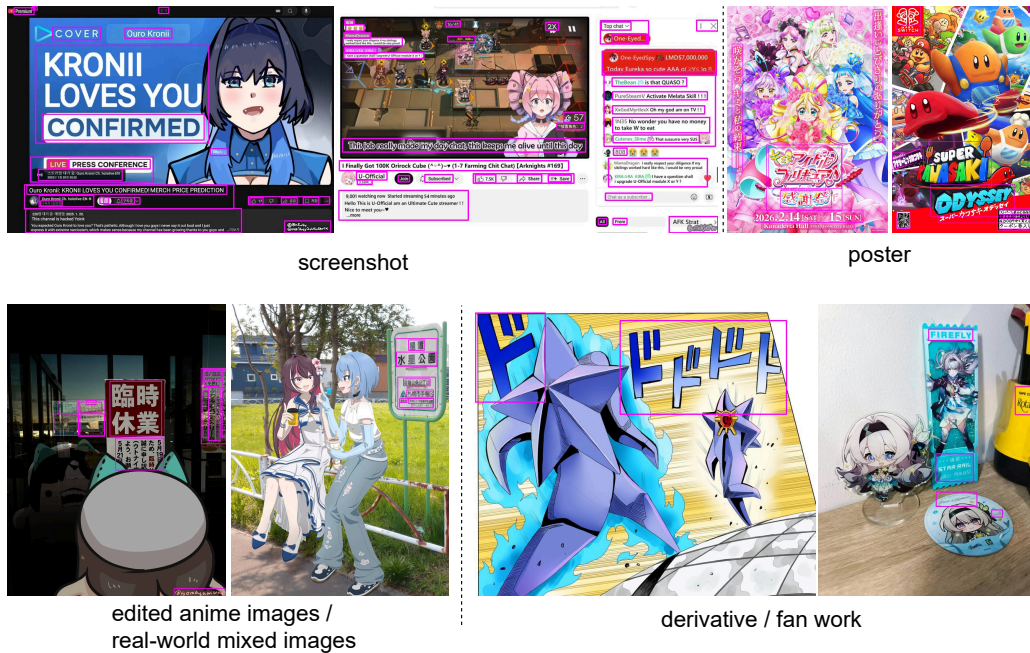

Figure II: Examples of images with high text density in anime scene.
